# Supplementary material for: Polymorphism of the ABO gene associate with thrombosis risk in patients with paroxysmal nocturnal hemoglobinuria
Source: PubMed Central journal article supplement (PMC5696192; doi:10.18632/oncotarget.21361), 2017-09-28
Supplement: oncotarget-08-92411-s001.pdf [file oncotarget-08-92411-s001.pdf]

# Polymorphism of the *ABO* gene associate with thrombosis risk in patients with paroxysmal nocturnal hemoglobinuria

## SUPPLEMENTARY MATERIALS

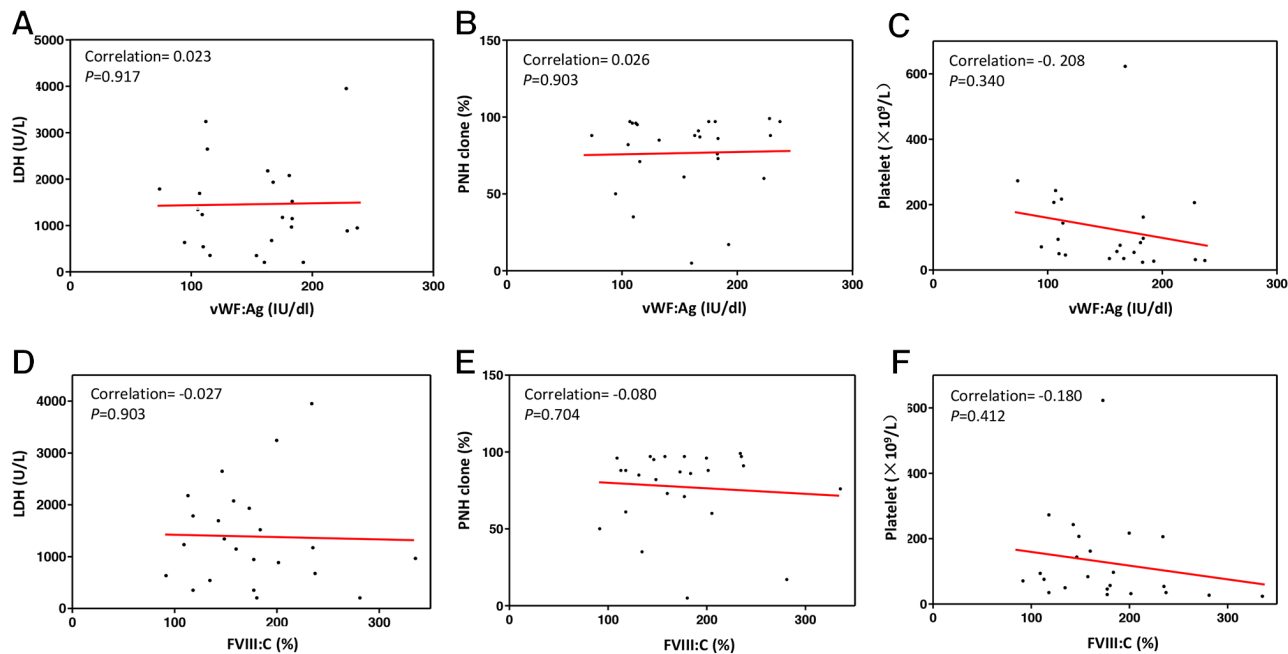

**Supplementary Figure 1:** Correlation with the level of vWF:Ag and FVIII: C with possible factors among PNH patients: Correlation of the level of vWF:Ag with LDH (A), PNH clone (B), platelet (C); correlation of the level of FVIII:C with LDH (D), PNH clone (E), platelet (F).

Supplementary Table 1: Twenty-six alleles of 17 genes were detected in this study

| Gene name        | SNP         | Associated phenotype                 |
|------------------|-------------|--------------------------------------|
| <b>ABO</b>       | rs495828    | vWF↑, VIII↑                          |
|                  | rs8176704   | vWF↑, VIII↑                          |
|                  | rs8176719   | vWF↑, VIII↑                          |
|                  | rs8176747   | vWF↑, VIII↑                          |
|                  | rs8176750   | vWF↑, VIII↑                          |
|                  | rs2519093   | vWF↑, VIII↑                          |
| <b>STXBP5</b>    | rs1039084   | vWF↑                                 |
| <b>vWF</b>       | rs1063856   | vWF↑                                 |
| <b>PROC</b>      | rs146922325 | Protein C↓                           |
| <b>GP6</b>       | rs1613662   | platelet activation                  |
| <b>THBD</b>      | rs16984852  | thrombomodulin↓                      |
| <b>F2</b>        | rs1799963   | FII↑                                 |
| <b>MTHFR</b>     | rs1801133   | methylenetetrahydrofolate reductase↓ |
|                  | rs397507444 | methylenetetrahydrofolate reductase↓ |
| <b>PROS1</b>     | rs199469491 | Protein S↓                           |
|                  | rs199469495 | Protein S↓                           |
|                  | rs121918474 | Protein S↓                           |
| <b>F11</b>       | rs2036914   | FXI↑                                 |
|                  | rs2289252   | FXI↑                                 |
| <b>FGG</b>       | rs2066865   | Fibrinogen YY'↓                      |
| <b>SLC44A2</b>   | rs2288904   | unkonwn                              |
| <b>F5 leiden</b> | rs6025      | Resistance to activated pro C        |
| <b>KNG1</b>      | rs710446    | aPTT↓                                |
| <b>TSPAN15</b>   | rs78707713  | unkonwn                              |
| <b>PROCR</b>     | rs867186    | sEPCR↑                               |
| <b>VKORC1</b>    | rs9923231   | vitamin K↑                           |

Supplementary Table 2: Primers used for this study

| SNP         | 1st-PCR                         | 2nd-PCR                        | UEP_SEQ                    |
|-------------|---------------------------------|--------------------------------|----------------------------|
| rs495828    | ACGTTGGATGCAGGTGTCATGGAGAAATGG  | ACGTTGGATGACCTGTAACTGTTGCAAGGG | TTGCAAGGGAGGTAAA           |
| rs8176704   | ACGTTGGATGATTACCAGACACGTCGAAG   | ACGTTGGATGGGGCCTCATGGTTGTAGAC  | AAACTCCACTCTGCC            |
| rs8176719   | ACGTTGGATGTGTCGATGTTGAATGTGCC   | ACGTTGGATGCATGTGCAGTAGGAAGGATG | AGGATGTCCTCGTGGT           |
| rs8176747   | ACGTTGGATGACGAGGGCGATTCTACTAC   | ACGTTGGATGTGGTCGACCATCATGGCCTG | ACCGACCCCCGAAGAAC          |
| rs8176750   | ACGTTGGATGTAAAACCAAGGGCGGGAGG   | ACGTTGGATGGGTGCCAAGAACCACCAG   | AGGCGGTCCGGAACC            |
| rs2519093   | ACGTTGGATGTATACACCTACTATGAACCC  | ACGTTGGATGAATGAATAAATAAGCCACC  | ccccTAAGCCACCGACTGA        |
| rs1039084   | ACGTTGGATGGGAGGTATGTAGTATGCTTG  | ACGTTGGATGTAACTTTGAGCACCCAAGCC | AAGCCCCAATTACCTCCG         |
| rs1063856   | ACGTTGGATGCATGGTCAAGCTGGTGTGTC  | ACGTTGGATGTGCACTCCAGGTCATAGTTC | TCTGGCACGTTTTGG            |
| rs146922325 | ACGTTGGATGGGTCTTCTGTGTCCTCGTTTC | ACGTTGGATGCTCAGTGAAGTTCCTTTGTG | ccgGGGAGGCCCTGGAAG         |
| rs1613662   | ACGTTGGATGATTTCCAGGAACCTCTGTG   | ACGTTGGATGATGGACCCGTCAGAACCTAC | tcACCTACCTGTACCG           |
| rs16984852  | ACGTTGGATGGCAGCTTATAAACTCGAGCCC | ACGTTGGATGAGCCAGACACTTCTTGCC   | ctcaGCTGCGCGCAGCCCCTG      |
| rs1799963   | ACGTTGGATGTGAATAGCACTGGGAGCATT  | ACGTTGGATGTGGAACCAATCCCGTAAAAG | gttcaCAATAAAAAGTGACTCTCAGC |
| rs1801133   | ACGTTGGATGCTTGAAGGAGAAGGTGTCTG  | ACGTTGGATGCTTACAAAAGCGGAAGAATG | gaagGCTGCGTGATGATGAAATCG   |
| rs397507444 | ACGTTGGATGGCTGACCAGTGAAGAAAGTG  | ACGTTGGATGCTCAGTTTGTGACCATCCG  | tAGAGGTAAAGAACGAAGACT      |
| rs199469491 | ACGTTGGATGCACCTCCAGTTGTGATTTTG  | ACGTTGGATGTTGCACTTCGTGGTGGAAAG | AAGATTGAAGTTCAGCTTAAGAA    |
| rs199469495 | ACGTTGGATGAGCTAAAGAAGCTGTGATGG  | ACGTTGGATGACTTTGGTTCCAGCAATCC  | aGGCTAAAAAGGGGTCCA         |
| rs121918474 | ACGTTGGATGTCTACCATCTGCTCTTACC   | ACGTTGGATGGGAAGTTACCACTGTTCTG  | aaagGGTTTTGTTATGCTTTCAAAT  |
| rs2036914   | ACGTTGGATGTGCTTGGAGACAAGGAGTG   | ACGTTGGATGAAAGCAGCAGCTTTTGCCAG | AGCAGCTTTTGCCAGTAAAGA      |
| rs2289252   | ACGTTGGATGTTTTCTCCCTCAGGTTTCAG  | ACGTTGGATGAGTTGGATGAGGAGTTAGCG | GTGAGGCTTGCTCTCTCT         |
| rs2066865   | ACGTTGGATGATTACTACTGATGGTTGCC   | ACGTTGGATGGTTTCTAAGACTAGATAC   | TTCTAAGACTAGATACATGGTA     |
| rs2288904   | ACGTTGGATGATCTCTCTTGGCAGGGAGTG  | ACGTTGGATGTGACTCACAGGGTTGCTGG  | GGGCAGTCACCATCT            |
| rs6025      | ACGTTGGATGCTCTGGGCTAATAGGACTAC  | ACGTTGGATGCTTCAAGGACAAAATACCTG | AAGGACAAAATACCTGTATTCCT    |
| rs710446    | ACGTTGGATGTCAGGGATCCAATCGTCATC  | ACGTTGGATGCAGGACTCTGATCTCAITGC | ATATACCAGCTCCCA            |
| rs78707713  | ACGTTGGATGTTGCACTTACCTTCCACCC   | ACGTTGGATGGGAAGCTGAGCAGAAATGAG | cTGTGAGCAAAACAGCG          |
| rs867186    | ACGTTGGATGACAAGCCGCTCTACACTTC   | ACGTTGGATGAAGATGCCTACAGCCACACC | ACCAGCAATGATGAAAC          |
| rs9923231   | ACGTTGGATGTCTGGGAAGTCAAGCAAGAG  | ACGTTGGATGGCTAGGATTATAGGCGTGAG | aggaGTGAGCCACCGCACC        |

Supplementary Table 3: Sites of thrombosis in 17 patients

| Thrombus site     | Events, n | % of total |
|-------------------|-----------|------------|
| Venous            |           |            |
| Portal vein       | 6         | 28.6       |
| Mesenteric vein   | 3         | 14.3       |
| Cerebral vein     | 3         | 14.3       |
| Splenic vein      | 3         | 14.3       |
| Deep vein         | 3         | 14.3       |
| Pulmonary embolus | 1         | 4.8        |
| Arterial          |           |            |
| Cornary           | 2         | 9.5        |
| Total             | 21        | 100        |

Supplementary Table 4: Hardy-Weinberg equilibrium and minor allele frequency of 17 SNPs

| Gene name | SNP        | $\chi^2$ | <i>P</i> value | MAF    | MAF in database |
|-----------|------------|----------|----------------|--------|-----------------|
| ABO       | rs495828   | 1.136    | 0.286          | 0.1875 | 0.1603          |
|           | rs8176704  | 104      | <0.001         | 0.0577 | 0.0463          |
|           | rs8176719  | 3.119    | 0.077          | 0.4952 | 0.3438          |
|           | rs8176747  | 0.479    | 0.489          | 0.3173 | 0.1528          |
|           | rs2519093  | 2.36     | 0.125          | 0.1779 | 0.1414          |
| STXBP5    | rs1039084  | 0.68     | 0.41           | 0.2981 | 0.4571          |
| vWF       | rs1063856  | 2.649    | 0.104          | 0.0481 | 0.3363          |
| GP6       | rs1613662  | 0.063    | 0.802          | 0.024  | 0.1573          |
| THBD      | rs16984852 | 0.022    | 0.881          | 0.0144 | 0.0014          |
| F11       | rs2036914  | 0.283    | 0.595          | 0.2356 | 0.3936          |
|           | rs2289252  | 6.481    | 0.011          | 0.2596 | 0.3195          |
| FGG       | rs2066865  | 0.337    | 0.562          | 0.4856 | 0.3027          |
| SLC44A2   | rs2288904  | 0.238    | 0.626          | 0.3413 | 0.1827          |
| KNG1      | rs710446   | 0.415    | 0.519          | 0.2548 | 0.4153          |
| TSPAN15   | rs78707713 | 0.002    | 0.96           | 0.0048 | 0.0479          |
| PROCR     | rs867186   | 0.265    | 0.607          | 0.0481 | 0.096           |
| VKORC1    | rs9923231  | 1.177    | 0.278          | 0.0962 | 0.3556          |
